# Supplementary material
Source: MDPI journal article supplement (https://www.mdpi.com/2076-3271/11/3/44)
Supplement: s1 [file s1]

### Survival analysis result using only gene expression

| Cancer Type | Average of Low-Level Scores | Average of High-Level Scores |
|-------------|-----------------------------|------------------------------|
|             |                             |                              |
| Brca_hypo   | 0.36                        | 0.494                        |
| Lusc_hypo   | 0.347                       | 0.487                        |
| Coad_hypo   | 0.374                       | 0.563                        |
| Kirc_hypo   | 0.401                       | 0.515                        |
| Brca_hyper  | 0.365                       | 0.497                        |
| Lusc_hyper  | 0.335                       | 0.4819                       |
| Coad_hyper  | 0.374                       | 0.567                        |
| Kirc_hyper  | 0.394                       | 0.509                        |

| Cancer Type | Gene Name | Prognostic Score Level | Hazard Rate | P-value | Number of patients at score level | Number of deaths |
|-------------|-----------|------------------------|-------------|---------|-----------------------------------|------------------|
| Lusc_hypo   | ADGRD1    | low                    | 1.6715      | 0.0129  | 102                               | 46               |

### Survival analysis result using only DNA methylation

| Cancer Type | Average of Low-Level Scores | Average of High-Level Scores |
|-------------|-----------------------------|------------------------------|
|             |                             |                              |
| Brca_hypo   | 0.247                       | 0.648                        |
| Lusc_hypo   | 0.287                       | 0.618                        |
| Coad_hypo   | 0.224                       | 0.567                        |
| Kirc_hypo   | 0.187                       | 0.476                        |
| Brca_hyper  | 0.364                       | 0.765                        |
| Lusc_hyper  | 0.325                       | 0.700                        |
| Coad_hyper  | 0.362                       | 0.750                        |
| Kirc_hyper  | 0.488                       | 0.846                        |

| Cancer Type | Gene Name | Prognostic Score Level | Hazard Rate | P-value | Number of patients at score level | Number of deaths |
|-------------|-----------|------------------------|-------------|---------|-----------------------------------|------------------|
| Coad_hypo   | CPQ       | High                   | 3.280e-01   | 0.0456  | 44                                | 4                |
| Lusc_hypo   | LPCAT1    | high                   | 2.1294      | 0.00439 | 40                                | 20               |
|             | IMMP2L    | low                    | 1.7847      | 0.032   | 44                                | 19               |
|             | IMMP2L    | high                   | 1.7056      | 0.0112  | 97                                | 42               |

### Survival analysis result using only mutation status

| Cancer Type | Gene Name | Hazard Rate | P-value | Number of patients with the mutation | Number of deaths |
|-------------|-----------|-------------|---------|--------------------------------------|------------------|
| Brca_hypo   | ADGRD1    | 41.302      | 0.001   | 5                                    | 1                |
| Coad_hyper  | SLC9A3    | 3.791       | 0.009   | 9                                    | 5                |
|             | BRIP1     | 3.096       | 0.069   | 7                                    | 3                |
