# Supplementary material
Source: MDPI journal article supplement (https://www.mdpi.com/2076-3271/11/3/44)
Supplement: s1 [file s1]

**Survival analysis Cox PH model results for MOFA factors. (Results with hazard ratio > 1.0 and  $p$ -value < 0.05 are presented.)**

| Cancer Type | Factor Name | Hazard Rate | P-value |
|-------------|-------------|-------------|---------|
| Brca_hypo   | Factor 7    | 1.7714      | 0.0001  |
|             | Factor 15   | 1.5109      | 0.0198  |
| Coad_hypo   | Factor 7    | 2.053       | 0.0201  |
| Kirc_hypo   | Factor 8    | 4.5468      | 0.0005  |
| Brca_hyper  | Factor 4    | 1.3716      | 0.04    |
|             | Factor 8    | 1.4244      | 0.015   |

**Similarities between the genes in significant MOFA factors and the genes in Tables 11 and 13 of the manuscript. Significant MOFA factors are identified as the first three factors through variance decomposition analysis, and the factors found to be significant in the survival analysis.**

| Cancer Type | Gene Name | Factor Name | Omics Data Type |
|-------------|-----------|-------------|-----------------|
| Brca_hypo   | EGFR      | Factor 2    | Mutation        |
|             | PRKDC     | Factor 2    | Mutation        |
|             | EGFR      | Factor 3    | Mutation        |
|             | PRKDC     | Factor 3    | Mutation        |
|             | CBX2      | Factor 7    | Gene expression |
|             | ADGRD1    | Factor 7    | Gene expression |
|             | PRKDC     | Factor 7    | Mutation        |
|             | GNG11     | Factor 15   | Gene expression |
| Coad_hypo   | PRKDC     | Factor 1    | Mutation        |
|             | TPRG1L    | Factor 2    | DNA Methylation |
|             | LGR4      | Factor 3    | DNA Methylation |
|             | BRIP1     | Factor 3    | DNA Methylation |
|             | CDKN3     | Factor 7    | DNA Methylation |
| Kirc_hypo   | MRPL36    | Factor 2    | DNA Methylation |
|             | CLN8      | Factor 2    | Mutation        |
|             | RAN       | Factor 3    | DNA Methylation |
|             | PRKDC     | Factor 3    | Mutation        |
|             | PRKDC     | Factor 8    | Mutation        |
|             | ADGRD1    | Factor 8    | Mutation        |
| Lusc_hypo   | LPCAT1    | Factor 1    | Gene expression |
| Brca_hyper  | PRKDC     | Factor 1    | Mutation        |
|             | PRKDC     | Factor 3    | Mutation        |
|             | PRKDC     | Factor 4    | Mutation        |
|             | TBX2-AS1  | Factor 8    | Gene expression |
| Coad_hyper  | SLC9A3    | Factor 2    | Mutation        |
|             | PRDM16-DT | Factor 3    | DNA Methylation |
| Lusc_hyper  | PRKDC     | Factor 1    | Mutation        |
|             | ENPP5     | Factor 3    | Gene expression |
| Kirc_hyper  | PRDM16-DT | Factor 1    | Gene expression |
|             | CLN8      | Factor 1    | Mutation        |
|             | SLC9A3    | Factor 2    | Gene expression |
|             | ENPP5     | Factor 2    | Gene expression |
|             | CYP39A1   | Factor 3    | DNA Methylation |
|             | ENPP5     | Factor 3    | DNA Methylation |
|             | CLN8      | Factor 3    | Mutation        |
|             | BRIP1     | Factor 3    | Mutation        |
