# Supplementary material
Source: MDPI journal article supplement (https://www.mdpi.com/2076-3271/11/3/44)
Supplement: s1 [file s1]

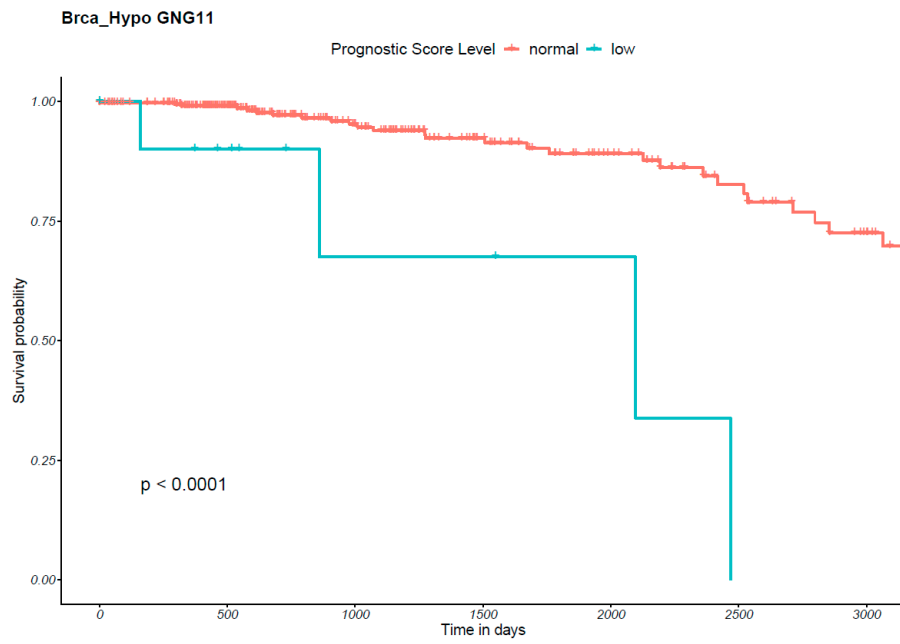

**Kaplan Meier analysis result for the Brca\_Hypo GNG11 gene**

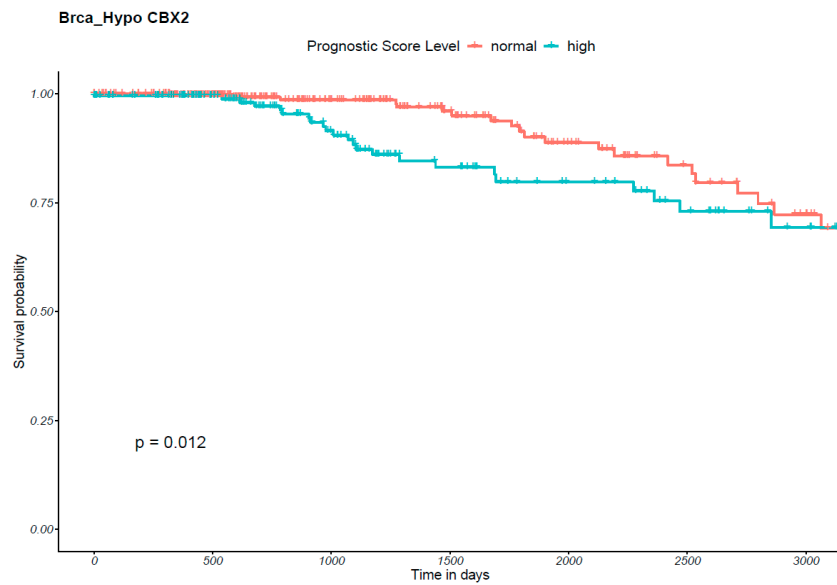

**Kaplan Meier analysis result for the Brca\_Hypo CBX2 gene**

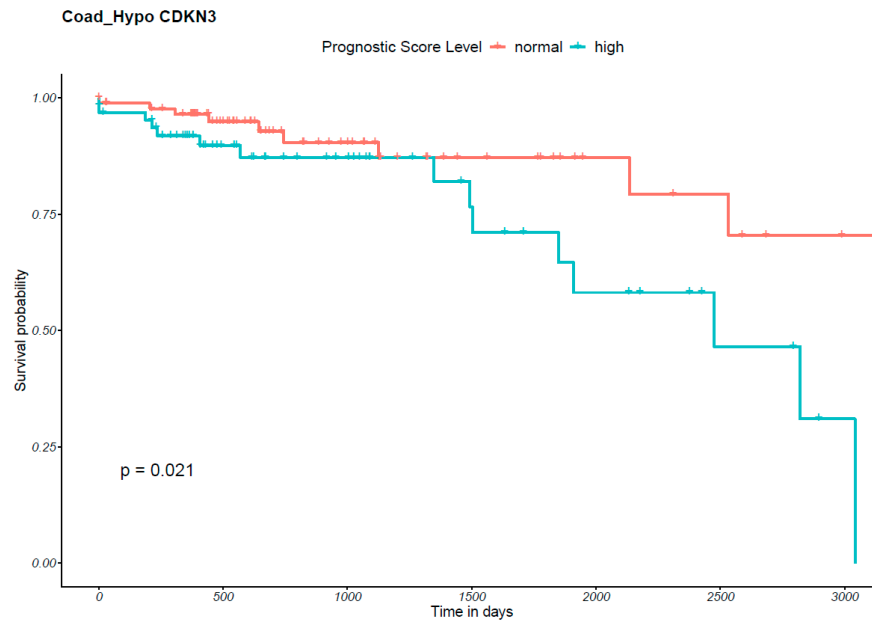

**Kaplan Meier analysis result for the Coad\_Hypo CDKN3 gene**

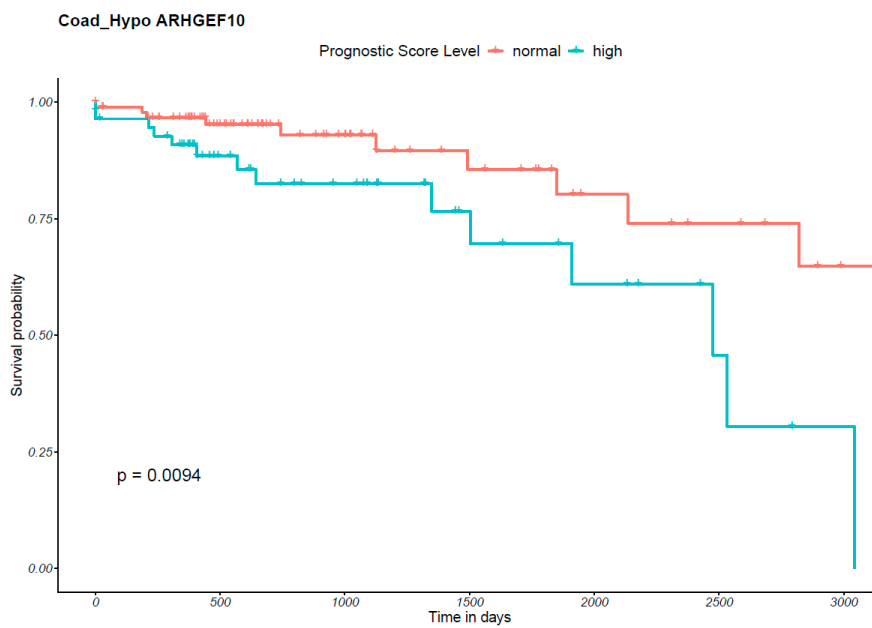

**Kaplan Meier analysis result for the Coad\_Hypo ARHGEF10 gene**

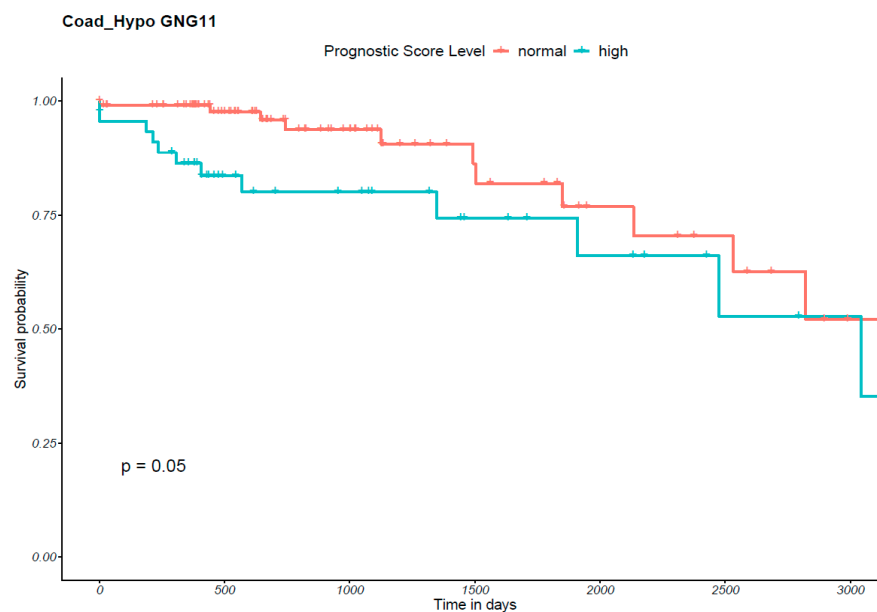

**Kaplan Meier analysis result for the Coad\_Hypo GNG11 gene**

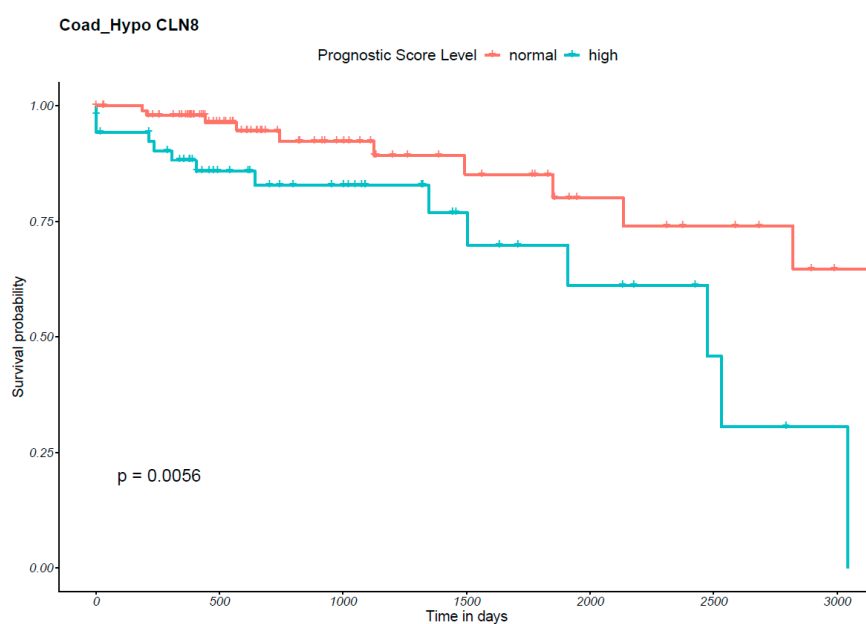

**Kaplan Meier analysis result for the Coad\_Hypo CLN8 gene**

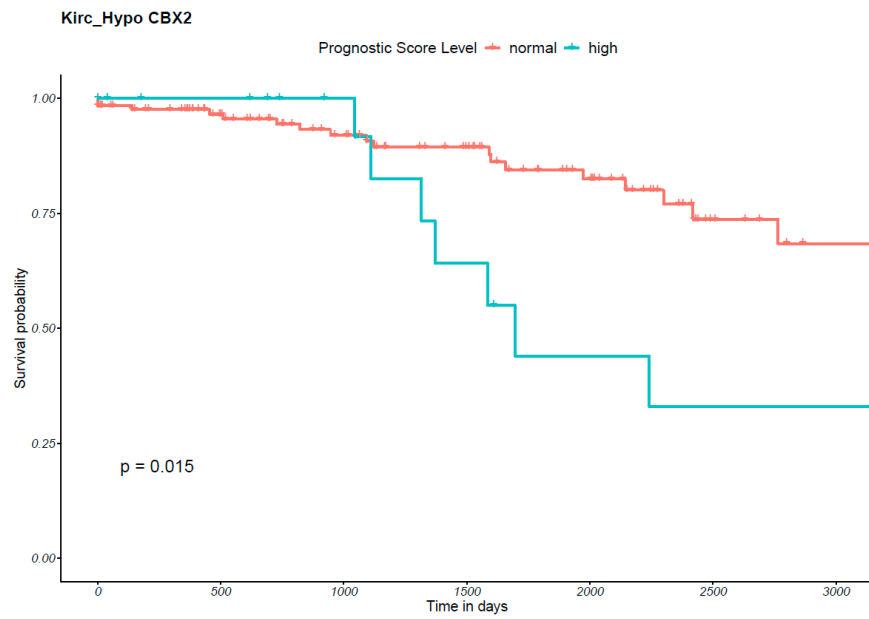

**Kaplan Meier analysis result for the Kirc\_Hypo CBX2 gene**

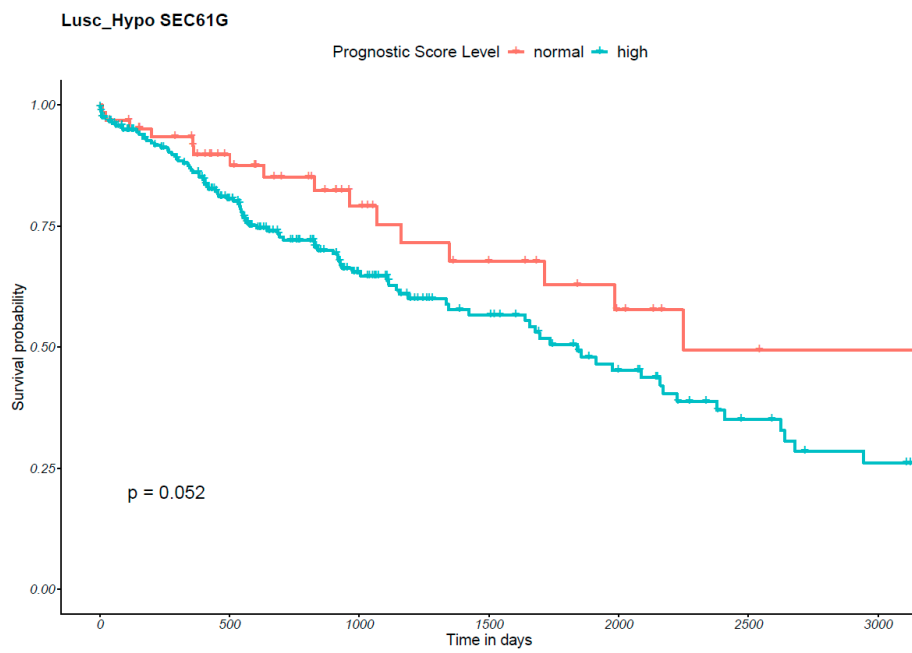

**Kaplan Meier analysis result for the Lusc\_Hypo SEC61G gene**

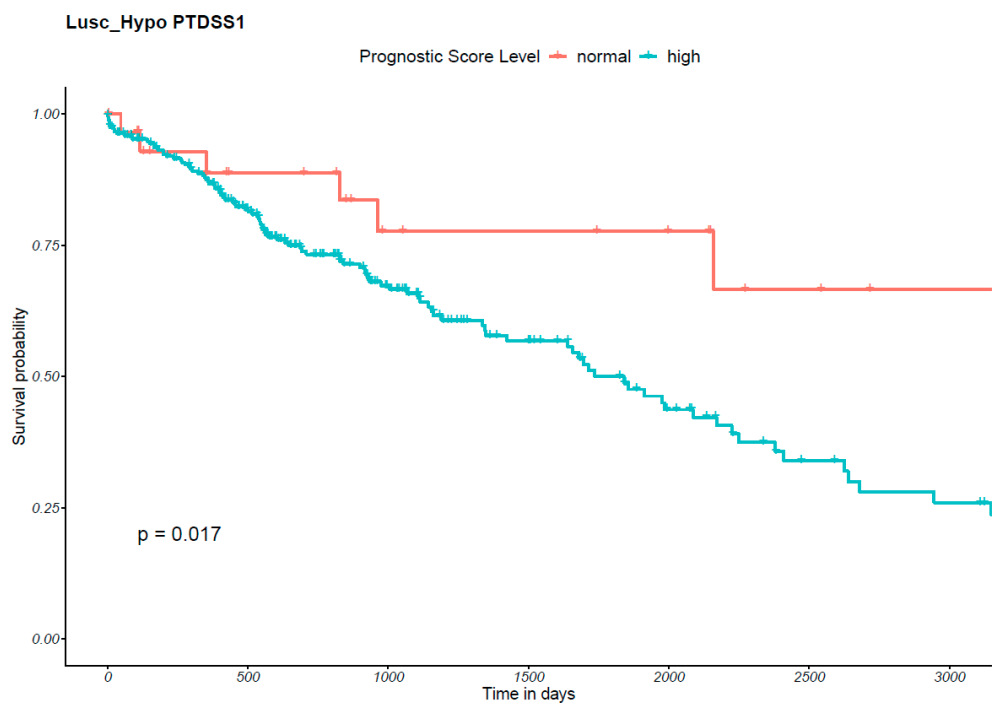

**Kaplan Meier analysis result for the Lusc\_Hypo PTDSS1 gene**
