# Supplementary material
Source: MDPI journal article supplement (https://www.mdpi.com/2076-3271/11/3/44)
Supplement: s1 [file s1]

**Average cut-off values for the high and low levels. (0.4 – 0.4 – 0.2 version)**

| <b>Cancer Type</b> | <b>Average of Low-Level Scores</b> | <b>Average of High-Level Scores</b> |
|--------------------|------------------------------------|-------------------------------------|
| <b>Brca_hypo</b>   | 0.264                              | 0.437                               |
| <b>Lusc_hypo</b>   | 0.275                              | 0.424                               |
| <b>Coad_hypo</b>   | 0.264                              | 0.438                               |
| <b>Kirc_hypo</b>   | 0.253                              | 0.379                               |
| <b>Brca_hyper</b>  | 0.312                              | 0.485                               |
| <b>Lusc_hyper</b>  | 0.283                              | 0.454                               |
| <b>Coad_hyper</b>  | 0.323                              | 0.508                               |
| <b>Kirc_hyper</b>  | 0.371                              | 0.524                               |

**Survival analysis Cox PH model results (0.4 – 0.4 – 0.2 version)**

| <b>Cancer Type</b> | <b>Gene Name</b> | <b>Prognostic Score Level</b> | <b>Hazard Rate</b> | <b>P-value</b> | <b>Number of patients at score level</b> | <b>Number of deaths</b> |
|--------------------|------------------|-------------------------------|--------------------|----------------|------------------------------------------|-------------------------|
| <b>Brca_hypo</b>   | PRDM16-DT        | high                          | 3.8503             | 0.00233        | 43                                       | 7                       |
| <b>Coad_hypo</b>   | LPCAT1           | low                           | 5.5965             | 0.00109        | 47                                       | 12                      |
| <b>Lusc_hypo</b>   | BDNF-AS          | high                          | 1.5783             | 0.04650        | 62                                       | 29                      |
|                    | IMMP2L           | high                          | 2.6882             | 0.00127        | 28                                       | 15                      |
