# Supplementary material
Source: MDPI journal article supplement (https://www.mdpi.com/2076-3271/11/3/44)
Supplement: s1 [file s1]

**Baseline clinical characteristics of the TCGA - BRCA training set and validation set**

| <b>BRCA</b>     | <b>Training set</b> |      | <b>Validation set</b> |      |                                 |
|-----------------|---------------------|------|-----------------------|------|---------------------------------|
| Characteristics | Number of cases     | %    | Number of cases       | %    | Chi-square test <i>p</i> -value |
| <b>Age</b>      |                     |      |                       |      |                                 |
| <60             | 132                 | 50.6 | 155                   | 55.6 | 0.2834                          |
| ≥ 60            | 129                 | 49.4 | 124                   | 44.4 |                                 |
| <b>Gender</b>   |                     |      |                       |      |                                 |
| Female          | 258                 | 98.8 | 277                   | 99.3 | 0.9403                          |
| Male            | 3                   | 1.2  | 2                     | 0.7  |                                 |
| <b>Status</b>   |                     |      |                       |      |                                 |
| Alive           | 231                 | 88.5 | 255                   | 91.4 | 0.3291                          |
| Dead            | 30                  | 11.5 | 24                    | 8.6  |                                 |
| <b>Stage</b>    |                     |      |                       |      |                                 |
| Stage I         | 61                  | 23.4 | 62                    | 22.2 | 0.8293                          |
| Stage II        | 200                 | 76.6 | 217                   | 77.8 |                                 |

**Baseline clinical characteristics of the TCGA - LUSC training set and validation set**

| <b>LUSC</b>     | <b>Training set</b> |      | <b>Validation set</b> |      |                                 |
|-----------------|---------------------|------|-----------------------|------|---------------------------------|
| Characteristics | Number of cases     | %    | Number of cases       | %    | Chi-square test <i>p</i> -value |
| <b>Age</b>      |                     |      |                       |      |                                 |
| <60             | 21                  | 13.7 | 30                    | 19.7 | 0.2101                          |
| ≥ 60            | 132                 | 86.3 | 122                   | 80.3 |                                 |
| <b>Gender</b>   |                     |      |                       |      |                                 |
| Female          | 50                  | 32.7 | 32                    | 21   | 0.03071                         |
| Male            | 103                 | 67.3 | 120                   | 79   |                                 |
| <b>Status</b>   |                     |      |                       |      |                                 |
| Alive           | 79                  | 51.6 | 106                   | 69.7 | 0.001817                        |
| Dead            | 74                  | 48.4 | 46                    | 30.3 |                                 |
| <b>Stage</b>    |                     |      |                       |      |                                 |
| Stage I         | 86                  | 56.2 | 86                    | 56.6 | 1                               |
| Stage II        | 67                  | 43.8 | 66                    | 43.4 |                                 |

**Baseline clinical characteristics of the TCGA - COAD training set and validation set**

| <b>COAD</b>     | <b>Training set</b> |      | <b>Validation set</b> |      |                                 |
|-----------------|---------------------|------|-----------------------|------|---------------------------------|
| Characteristics | Number of cases     | %    | Number of cases       | %    | Chi-square test <i>p</i> -value |
| <b>Age</b>      |                     |      |                       |      |                                 |
| <60             | 21                  | 28.4 | 20                    | 25.6 | 0.8436                          |
| ≥60             | 53                  | 71.6 | 58                    | 74.4 |                                 |
| <b>Gender</b>   |                     |      |                       |      |                                 |
| Female          | 36                  | 48.6 | 36                    | 46.2 | 0.8844                          |
| Male            | 38                  | 51.4 | 42                    | 53.8 |                                 |
| <b>Status</b>   |                     |      |                       |      |                                 |
| Alive           | 64                  | 86.5 | 64                    | 82   | 0.5982                          |
| Dead            | 10                  | 13.5 | 14                    | 18   |                                 |
| <b>Stage</b>    |                     |      |                       |      |                                 |
| Stage I         | 22                  | 29.7 | 22                    | 28.2 | 0.9775                          |
| Stage II        | 52                  | 70.3 | 56                    | 71.8 |                                 |

**Baseline clinical characteristics of the TCGA - KIRC training set and validation set**

| <b>KIRC</b>     | <b>Training set</b> |      | <b>Validation set</b> |      |                                 |
|-----------------|---------------------|------|-----------------------|------|---------------------------------|
| Characteristics | Number of cases     | %    | Number of cases       | %    | Chi-square test <i>p</i> -value |
| <b>Age</b>      |                     |      |                       |      |                                 |
| <60             | 45                  | 50   | 46                    | 50.5 | 1                               |
| ≥60             | 45                  | 50   | 45                    | 49.5 |                                 |
| <b>Gender</b>   |                     |      |                       |      |                                 |
| Female          | 40                  | 44.4 | 33                    | 36.3 | 0.3319                          |
| Male            | 50                  | 55.6 | 58                    | 63.7 |                                 |
| <b>Status</b>   |                     |      |                       |      |                                 |
| Alive           | 76                  | 84.4 | 77                    | 84.6 | 1                               |
| Dead            | 14                  | 15.6 | 14                    | 15.4 |                                 |
| <b>Stage</b>    |                     |      |                       |      |                                 |
| Stage I         | 81                  | 90   | 76                    | 83.5 | 0.2861                          |
| Stage II        | 9                   | 10   | 15                    | 16.5 |                                 |
